# Supplementary material for: The association between mentoring and training outcomes in junior doctors in medicine: an observational study
Source: PubMed Central journal article supplement — BMJ Open. 2018 Sep 21;8(9):e020721. doi: 10.1136/bmjopen-2017-020721 (PMC6157572; doi:10.1136/bmjopen-2017-020721), 2018-09-21
Supplement: bmjopen-2017-020721supp002.pdf [file bmjopen-2017-020721supp002.pdf]

## MRCP Exams: Pass Rates by Stage of Training

|                             | <i>Mentored<br/>(1)</i> | <i>Non-mentored<br/>(2)</i> | <i>p-value<br/>(1) Vs (2)</i> |
|-----------------------------|-------------------------|-----------------------------|-------------------------------|
| <b><i>CMT Year 1</i></b>    |                         |                             |                               |
| MRCP Part 1 (Written)       | 100.0% (4/4)            | 19.4% (6/31)                | p < 0.01                      |
| MRCP Part 2 (Written)       | 75.0% (3/4)             | 6.5% (2/31)                 | p < 0.01                      |
| MRCP Part 2 (PACES)         | 50.0% (2/4)             | 3.2% (1/31)                 | p < 0.05                      |
| Full MRCP (UK)              | 50.0% (2/4)             | 3.2% (1/31)                 | p < 0.05                      |
| <b><i>CMT Year 2</i></b>    |                         |                             |                               |
| MRCP Part 1 (Written)       | 100.0% (8/8)            | 41.4% (12/29)               | p < 0.01                      |
| MRCP Part 2 (Written)       | 25.0% (2/8)             | 31.0% (9/29)                | p = 1.00                      |
| MRCP Part 2 (PACES)         | 37.5% (3/8)             | 31.0% (9/29)                | p = 1.00                      |
| Full MRCP (UK)              | 25.0% (2/8)             | 31.0% (9/29)                | p = 1.00                      |
| <b><i>ST3 and above</i></b> |                         |                             |                               |
| MRCP Part 1 (Written)       | 71.4% (5/7)             | 86.7% (13/15)               | p = 1.00                      |
| MRCP Part 2 (Written)       | 57.1% (4/7)             | 80.0% (12/15)               | p = 0.33                      |
| MRCP Part 2 (PACES)         | 57.1% (4/7)             | 80.0% (12/15)               | p = 0.33                      |
| Full MRCP (UK)              | 57.1% (4/7)             | 80.0% (12/15)               | p = 0.33                      |
| <b><i>Others</i></b>        |                         |                             |                               |
| MRCP Part 1 (Written)       | 66.7% (4/6)             | 50.0% (5/10)                | p = 0.63                      |
| MRCP Part 2 (Written)       | 33.3% (2/6)             | 30.0% (3/10)                | p = 1.00                      |
| MRCP Part 2 (PACES)         | 33.3% (2/6)             | 30.0% (3/10)                | p = 1.00                      |
| Full MRCP (UK)              | 33.3% (2/6)             | 30.0% (3/10)                | p = 1.00                      |
